# Supplementary material for: Development of a bead-based assay for detection of three banana-infecting viruses
Source: PeerJ journal article supplement (doi:10.7717/peerj.13409), 2022-05-26
Supplement: s1_BBTV_primer_design_for_banana_LQ2(0907).pdf [file s1_BBTV_primer_design_for_banana_LQ2%280907%29.pdf]

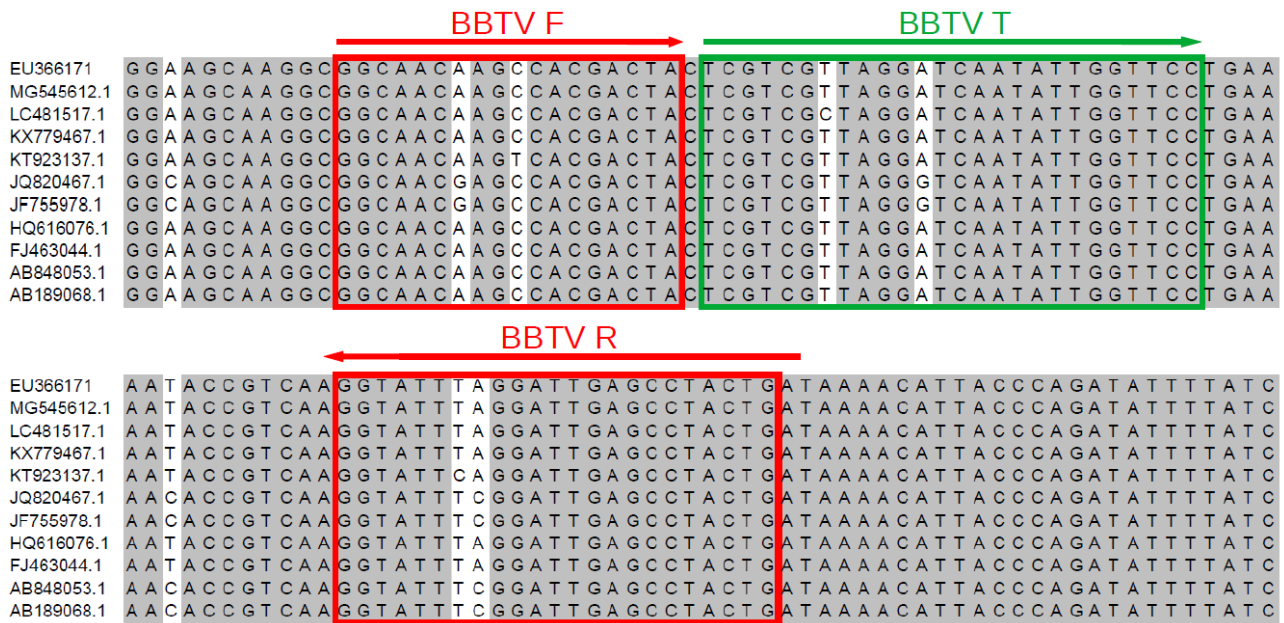

**Fig. S1.** Primer and probe design for LiquiChip detection of Banana bunchy top virus. Accession numbers for the aligned isolates (top to bottom) are EU\_366171, MG\_545612.1, LC\_481517.1, KX\_779467.1, KT\_923137.1, JQ\_820467.1, JF\_755978.1, HQ\_616076.1, FJ\_463044.1, AB\_848053.1, AB\_189068.1 were aligned and compared. Design of the primers (BBTV-F, BBTV-R) and probe (BBTV-P) were based on conserved sequences within the CP gene.
