# Supplementary material for: Development of a bead-based assay for detection of three banana-infecting viruses
Source: PeerJ journal article supplement (doi:10.7717/peerj.13409), 2022-05-26
Supplement: S2_BSV_alignment_BSV124(0819)b.pdf [file S2_BSV_alignment_BSV124%280819%29b.pdf]

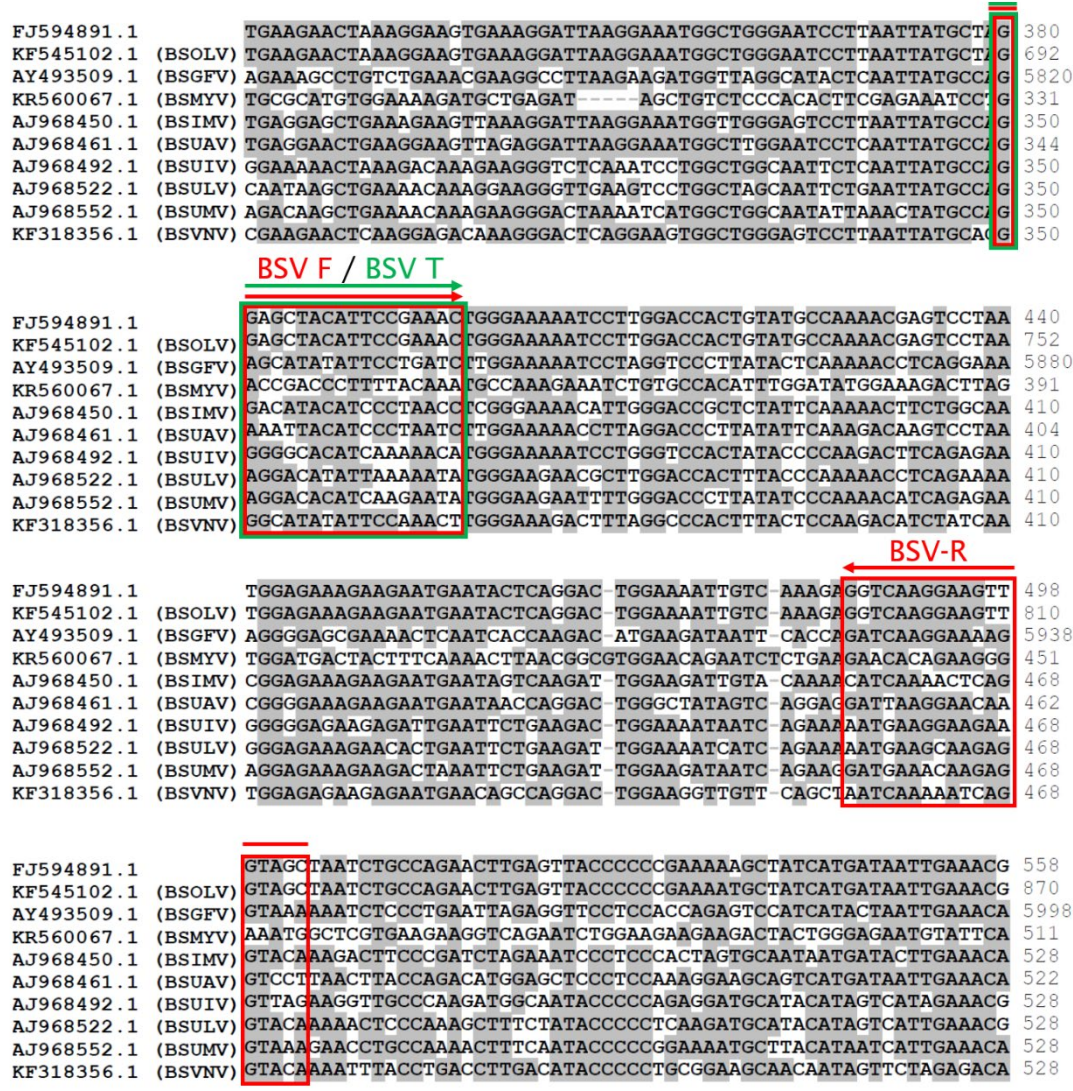

**Figure S2 Primer and probe design for LiquiChip detection of Banana streak virus.** Accession numbers for the aligned isolates (top to bottom) are FJ594891, AY101189.1, FJ439815.1, FJ594892.1, HM447634.1, JQ346523.1, JQ911618.1, KF545102.1, KF548092.1, MH931389.1, AB\_189068.1 were aligned and compared. Design of the primers (BSV-F, BSV-R) and probe (BSV-P) were based on conserved sequences within the RNase H gene.
