# Supplementary material for: Development of a bead-based assay for detection of three banana-infecting viruses
Source: PeerJ journal article supplement (doi:10.7717/peerj.13409), 2022-05-26
Supplement: s3CMV_primer_design_for_banana_LQ2(0907)b.pdf [file s3CMV_primer_design_for_banana_LQ2%280907%29b.pdf]

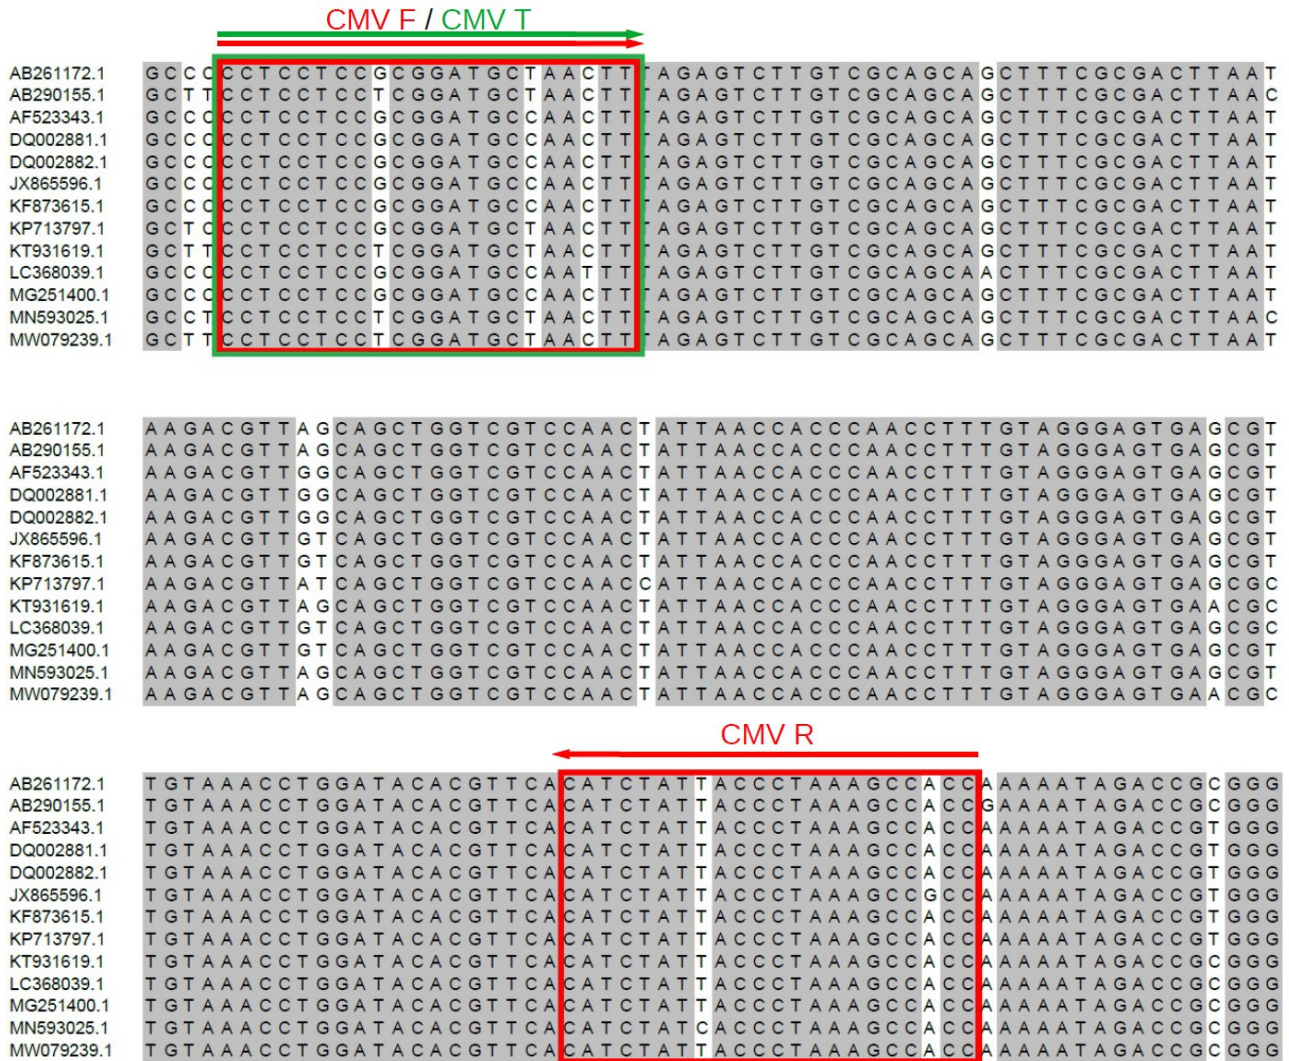

**Figure S3 Primer and probe design for LiquiChip detection of Cucumber mosaic virus.** Accession numbers for the aligned isolates (top to bottom) are AB261172.1, AB290155.1, AF5233431, DQ002881.1, DQ002882.1, JX865596.1, KF873615.1, KP713797.1, KT931619.1, LC368039.1, MG251400.1, MN593025.1, MW079239.1 were aligned and compared. Design of the primers (CMV-F, CMV-R) and probe (CMV-P) were based on conserved sequences within the CP gene.
