# Supplementary material for: Development of a bead-based assay for detection of three banana-infecting viruses
Source: PeerJ. 2022 May 26;10:e13409. doi: 10.7717/peerj.13409 (PMC9148560; doi:10.7717/peerj.13409)
Supplement: Supplemental Information 1 [file peerj-10-13409-s001.xlsx]

## Sheet: Specificity
Sample	BBTV-26	Average	SD	BSV-33	Average	SD	CMV-42	Average	SD	UBQ-36	Average	SD
Healthy plant	55	90	44.441	1	6.33333	10.116	0	20.8333	36.0844	2207	2150.17	102.36
	75			0			62.5			2032
	140			18			0			2211.5
CMV	0	0.166667	0.288675	30.5	10.5	17.3277	4175	4057.17	556.192	1980	1977.5	29.8287
	0			0			3451.5			2006
	0.5			1			4545			1946.5
BSV	0	0	0	2631	2512.5	200.074	0	5.66667	9.81495	2114	1944.33	148.359
	0			2281.5			0			1839
	0			2625			17			1880
BBTV	2335	2641.33	397.115	23	17.5	15.5	40	13.3333	23.094	2265	2140.33	114.129
	2499			29.5			0			2115
	3090			0			0			2041
CMV+BSV	269	95.6667	150.381	2294	2435	122.967	4914.5	4298.17	650.603	1905	2127.5	282.622
	18			2491			3618			2032
	0			2520			4362			2445.5
CMV+BBTV	2974	2844.17	166.833	0	0	0	3573.5	3616.17	173.481	1974.5	2016.33	220.25
	2656			0			3468			2254.5
	2902.5			0			3807			1820
BSV+BBTV	2682	2697.33	175.503	2580	2487.83	148.1	0	0	0	1940	2045.33	97.3516
	2880			2317			0			2064
	2530			2566.5			0			2132
Mix	2704	2711	178.603	2543	2561.33	182.193	3585	3170.33	359.538	1773	1932.67	177.004
	2893			2752			2980.5			1902
	2536			2389			2945.5			2123
NTC	14	17.3333	19.218	7	10	11.7898	0	22.5	31.5	2.5	6.83333	9.75107
	0			0			9			18
	38			23			58.5			0
BG	0	0	0	35.5	16.1667	17.9606	0	0	0	0	0	0
	0			13			0			0
	0			0			0			0
BC	-1	-1	0	-1	-1	0	-1	-1	0	-1	-1	0
	-1			-1			-1			-1

## Sheet: Sensitivity
Sample	BBTV-26	Average	SD	BSV-33	Average	SD	CMV-42	Average	SD	UBQ-36	Average	SD
1e-08	1419.5	1445.25	36.416	1847	2015.5	238.295	1870	1967.5	137.886	1489	1613	175.362
	1471			2184			2065			1737
1e-09	1079.5	1130.75	72.4784	2124	2073	72.1249	2206	2102.5	146.371	1484.5	1396.25	124.804
	1182			2022			1999			1308
1e-10	883	841.75	58.3363	1867	1948	114.551	1553	1562.5	13.435	1595	1785.25	269.054
	800.5			2029			1572			1975.5
1e-11	257	264	9.89949	2104	2187	117.38	1415	1298.25	165.109	1599	1485	161.22
	271			2270			1181.5			1371
1e-12	199	230	43.8406	1945.5	1972.25	37.8302	459	502.25	61.1647	1351	1276.5	105.359
	261			1999			545.5			1202
1e-13	104	81.5	31.8198	1997	1861	192.333	220	284.5	91.2168	354.5	437.5	117.38
	59			1725			349			520.5
1e-14	200	305	148.492	1267	1233.5	47.3762	0	0	0	28	18	14.1421
	410			1200			0			8
1e-15	0	15.75	22.2739	42.5	30.75	16.617	2	1	1.41421	26	13	18.3848
	31.5			19			0			0
1e-16	82	82	0	31	32.75	2.47487	65	32.5	45.9619	0	11	15.5563
	82			34.5			0			22
NTC	22	21.5	0.707107	99	99.5	0.707107	0	0	0	0	0.75	1.06066
	21			100			0			1.5
BG	0	7.5	10.6066	36	39.5	4.94975	12	10.5	2.12132	8	4	5.65685
	15			43			9			0
BC	-1	-1	0	0	-0.5	0.707107	-1	-1	0	-1	-1	0
	-1			-1			-1			-1
